# Supplementary material
Source: Springer Nature journal article supplement (https://www.springermedizin.de/resource/supplementary/12986_2005_35_MOESM3_ESM.pdf/25655226)

# Serum BAP

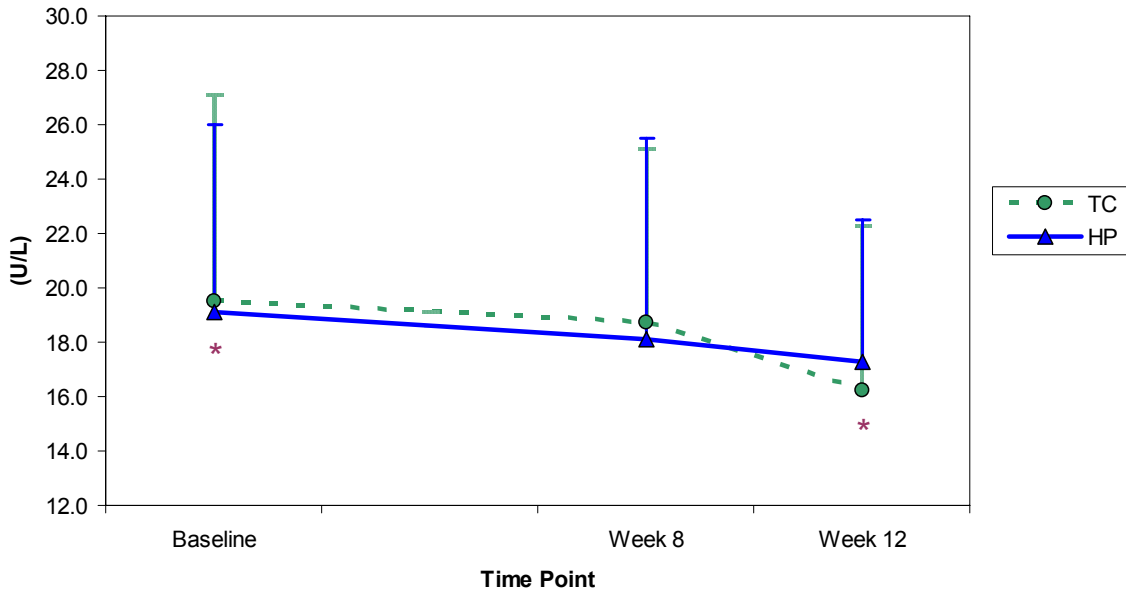

Supplement: MOESM3 [file 25655226]
